1 **Full Title: Boysenberry and apple juice concentrate reduces acute lung**  
2 **inflammation through increased alternatively activated macrophage activity in**  
3 **an acute mouse model of allergic airways disease**

4 Odette M. Shaw<sup>1\*</sup>, Roger D Hurst<sup>2</sup>, Janine Cooney<sup>3</sup>, Gregory M. Sawyer<sup>1</sup>, Hannah  
5 Dinnan<sup>1</sup>, Sheridan Martell<sup>1</sup>

6 <sup>1</sup>Nutrition & Health Group, Food Innovation Portfolio, The New Zealand Institute for  
7 Plant and Food Research Limited, Palmerston North, New Zealand

8 <sup>2</sup> Food Innovation Portfolio, The New Zealand Institute for Plant and Food Research  
9 Limited, Palmerston North, New Zealand

10 <sup>3</sup>Biological Chemistry & Bioactives Group, Food Innovation Portfolio, The New  
11 Zealand Institute for Plant and Food Research Limited, Hamilton, New Zealand

12 **\*Correspondence:**

13 Odette Shaw

14 [odette.shaw@plantandfood.co.nz](mailto:odette.shaw@plantandfood.co.nz)

15 **Short title:** M2 macrophage reduce acute allergic airways inflammation

16 **Abstract:**

17 Bioactive compounds such as anthocyanins, proanthocyanins and other polyphenols  
18 are found in a wide variety of fruits and vegetables, and consumption of these have  
19 been associated with reduced lung inflammation and improved lung function in  
20 asthma and other lung diseases. We investigated whether a combination of  
21 Boysenberry and apple juice, found in BerriQi® Boysenberry and apple juice  
22 concentrate, could reduce the allergic airways inflammation associated with asthma.  
23 We characterised the polyphenolic components in BerriQi® Boysenberry and apple  
24 juice concentrate and identified the main compounds as cyanidin glycosides,  
25 ellagitannins, and chlorogenic acid. We found that consumption of 2.5 mg/kg of total  
26 anthocyanins from the BerriQi® Boysenberry and apple juice concentrate  
27 significantly reduced eosinophil infiltration following acute ovalbumin (OVA) exposure  
28 in a mouse model of allergic airways inflammation. We found that BerriQi®  
29 Boysenberry and apple juice concentrate consumption increased M2 (CD206+)  
30 macrophages and the production of the M2-associated cytokines CXCL10 and CCL4  
31 within the lung. These results suggest that consumption of BerriQi® Boysenberry  
32 and apple juice concentrate promotes a shift towards an anti-inflammatory  
33 environment within the lung leading to reduced immune cell infiltration and tissue  
34 damage.

35 **Keywords: allergic airways inflammation, Boysenberry, apple, anthocyanins,**  
36 **ellagitannins, alternatively activated macrophages.**

37

## 38 **1. Introduction**

39 Asthma is a heterogeneous, chronic, inflammatory lung disease characterized by  
40 reversible airways obstruction, bronchospasm and infiltration of immune cells (1-3). It  
41 is estimated that 150 million people are affected by asthma worldwide, with a 5–15%  
42 prevalence in children (4) and there is evidence that early life exposure to air  
43 pollution caused by vehicle exhaust, environmental dust and industrial processes,  
44 increases the severity of asthma in children (5-7). The respiratory symptoms such as  
45 cough, and wheeze are worsened by exposure to pollution (8). Proinflammatory  
46 cytokine production in response to allergens by immune cells are further increased  
47 with concomitant pollution exposure (9-13). Eosinophils, in particular, produce  
48 reactive oxygen species, and cytokines, leading to epithelial damage and contribute  
49 to mucosal inflammation and the recruitment of other proinflammatory immune cells  
50 (14-17). These repeated acute inflammatory responses lead to tissue damage and  
51 remodelling, contributing to airway hyperresponsiveness, mucus cell hyperplasia,  
52 fixed airway flow obstruction, and loss of lung function over time (18-21).

53 Large-scale epidemiological studies have found that increased fruit and vegetable  
54 consumption correlates with reduced asthma symptoms (22-25). These dietary-  
55 related improvements in lung function benefits are also seen in people living in  
56 polluted environments (26-28). Fruits and vegetables contain numerous bioactive  
57 compounds, including anthocyanins and procyanidins, which have been shown to  
58 attenuate lung inflammation in cell and animal models of allergy and asthma (29-34).  
59 Human population studies have identified that dietary intake of foods high in  
60 polyphenols (28) such as apples, pears (35), carrots, tomatoes (25) and citrus is  
61 inversely correlated with the frequency and severity of reported asthma symptoms,  
62 especially wheezing and coughing (22, 25, 35, 36). Previously, we have identified

63 that Boysenberry consumption led to decreased chronic lung inflammation, and  
64 improved lung tissue repair in an animal model of chronic allergic lung inflammation  
65 (33). Boysenberries contain high concentrations of anthocyanins and ellagitannins  
66 (37, 38). We have also found that procyanidin-rich extracts from apple suppressed  
67 IL-4 mediated cytokine production in cell culture models of lung epithelial allergic  
68 inflammation (32, 39).

69 There is increasing interest in understanding the mechanisms of action that specific  
70 plant bioactives have in the human body. This is partially to better understand the  
71 benefits of consuming specific fruits and vegetables, and partially to add value to  
72 specific foods through validated health claims. There is also interest in determining if  
73 combining specific plants containing different polyphenols can augment the health  
74 benefits above those seen with the individual plant. Use of animal models, where  
75 dietary intake can be tightly controlled are useful for both demonstrating/revealing  
76 the efficacy for identified compounds, and determining the biological mechanisms of  
77 action. The aim of this study was to determine whether the combination of  
78 Boysenberries and apple, as found in BerriQi® Boysenberry and apple juice  
79 concentrate at a dose of 2.5 mg/kg total anthocyanins (TAC) could reduce allergic  
80 airways inflammation in response to acute ovalbumin exposure in a mouse model  
81 system. We also sought to determine the mechanisms involved in any ameliorating  
82 effect.

## 83 **2. Methods**

### 84 **2.1 Mice and Materials**

85 C57BL/6J male mice were group housed on 12h light/dark cycle in a conventional  
86 animal facility at The New Zealand Institute for Plant and Food Research Limited

87 (Palmerston North, New Zealand). Mice were fed Prodiet RMH1800 standard chow  
88 for rodents (Lab Diet, St Louis, MO, USA) and filtered water ad libitum throughout  
89 the study, all attempts to minimise suffering were made. All experimental procedures  
90 were approved by the AgResearch Grasslands Animal Ethics Committee (AE  
91 approvals #14839, #14731 and #14016) and carried out in accordance with the  
92 Animal Welfare Act (1999). A proprietary Boysenberry and apple juice concentrate  
93 (BerriQi®) was supplied by Anagenix Ltd (Auckland, New Zealand). Legendplex™  
94 13-plex Th cytokine, proinflammatory cytokine and proinflammatory chemokine  
95 panels, Zombie NIR™ fixable viability dye, and anti-mouse CD3 (clone 17A2), CD4  
96 (clone GK1.5), CD8a (clone 53-6.7), CD80 (clone 16-10A1), CD86 (clone GL-1),  
97 CD11c (clone N418), CD45 (clone 30-F11), CD206 (clone C068C2), CD14 (clone  
98 Sa14-2), Ly6C (clone HK1.4), Gr-1 (clone RB6-8C5), I-A/I-E (MHC class II; clone  
99 M5/114.15.2), and F4/80 (clone BM8) were purchased from Biolegend (San Diego,  
100 CA, USA). Anti-mouse SiglecF (clone E50-2440) and CD11b (clone M1/70) were  
101 from BD Biosciences (San Jose, CA, USA). Ovalbumin (OVA), and Alum were  
102 purchased from Sigma (Auckland, New Zealand). iScript Advanced cDNA kit was  
103 from Bio-Rad Laboratories (Hercules, CA, USA). Unless otherwise stated, all cell  
104 culture media, supplements, Taqman probes and buffers were purchased from Life  
105 Technologies NZ (Auckland, NZ).

## 106 **2.2 BerriQi® Formulation and Chemical Composition Analysis**

107 Boysenberries (*Rubus ursinus* var *loganbaccus* cv Boysenberry), harvested between  
108 January-March 2017 from the Nelson region of NZ, were processed to a juice  
109 concentrate by Boysenberries NZ (Nelson, NZ). Apples (*Malus domestica* –mixed  
110 varieties) were harvested between April-June 2017 from the Hawkes Bay region of  
111 New Zealand, and juice concentrates prepared by Profruit Ltd. (Hastings, NZ). The

112 freshly harvested Boysenberries and apples were graded, milled and pressed into  
113 juice, de-seeded by centrifugation, pasteurised, depectinised by enzymatic  
114 treatment, clarified by centrifugation, and concentrated by evaporation by their  
115 respective manufacturers to yield fruit juice concentrates, each with an 8-fold  
116 concentration factor.

117 Shott NZ Ltd. (Wellington, NZ) then blended the juice concentrates (proprietary  
118 proportions), and added potassium sorbate preservative to a final concentration of  
119 0.12% (w/w), yielding a dark red, non-cloudy syrup. The final BerriQi® Boysenberry  
120 and apple juice concentrate product measured pH 3.39 (by pH meter) and was  
121 68.3° Brix (by refractometry), with a specific gravity of 1.35 mg/mL comprising 68%  
122 solids measured by both gravimetric and drying methods.

123 The polyphenol content of the BerriQi® Boysenberry and apple juice concentrate  
124 was determined by liquid chromatography-mass spectrometry (LC-MS) using an  
125 LTQ linear ion trap mass spectrometer fitted with an ESI interface (ThermoFisher  
126 Scientific, San Jose, CA, USA) coupled to an Ultimate 3000 UHPLC and PDA  
127 detector (Dionex, Sunnyvale, CA, USA). Anthocyanins were separated on a  
128 Poroshell 120 SB-C18, 2.1x150 mm, 2.7 µm, analytical LC column (Agilent,  
129 Torrance, CA, USA), maintained at 70°C. The solvents were (A) 5:3:92  
130 acetonitrile:formic acid:water v/v/v and (B) acetonitrile + 0.1% formic acid (flow rate,  
131 200 µL/min). The initial mobile phase, 100% A, was held for 2 min before being  
132 ramped linearly to 88% A at 14 min, returning to 5% A at 15 min and held for 4 min  
133 before resetting to the original conditions. The sample injection volume was 10 µL.  
134 The MS data were acquired in the positive mode. Anthocyanin concentrations are  
135 reported as cyanidin-3-O-glucoside equivalents.

136 Other phenolic compound separation was achieved using a Hypersil GOLD aQ 1.9μ  
137 C18 175Å (Thermo Scientific, Waltham, MA, USA), 150 × 2.1 mm column  
138 maintained at 45°C. The solvents were (A) water + 0.1% formic acid and (B)  
139 acetonitrile + 0.1% formic acid (flow rate, 200 μL/min). The initial mobile phase, 95%  
140 A/5% B, was ramped linearly to 85% A at 10 min, held for 3.75 min, then ramped  
141 linearly to 75% A at 18 min, 67.2% A at 25 min, 50% A at 28 min, 3% A at 29 min and  
142 held for 4 min before resetting to the original conditions. The sample injection volume  
143 was 4 μL. The MS data were acquired in the negative mode.

### 144 **2.3 OVA-Induced Airway Inflammation Model**

145 Allergic airway disease was induced as previously described (34, 40). For the  
146 Boysenberry and apple interventions, mice were randomized into receiving either  
147 water (vehicle control) or 2.5 mg/kg TAC in the BerriQi® Boysenberry and apple  
148 juice concentrate as previously described (34). Briefly, mice were fasted for 4 h  
149 before being orally gavaged with water (control) or at a dose of 2.5 mg/kg body  
150 weight TAC in the BerriQi® Boysenberry and apple juice concentrate made up to a  
151 total volume of 200 μL in water 1h before OVA challenge and again 2 days post-  
152 challenge. Mice were sacrificed 4 days following intranasal ovalbumin challenge and  
153 immune parameters were analyzed.

### 154 **2.4 Immune Parameter Analysis**

155 Bronchoalveolar lavage fluid (BALF) and lung tissues were collected as previously  
156 described and immune cells were phenotyped by flow cytometry (40). Lung tissue  
157 supernatant for cytokine analysis was prepared as previously described (34). Briefly,  
158 the left lung lobe was minced into 500 μL phenol red-free complete RPMI media and  
159 incubated at 37°C for 30 min before being filtered through a 40 μm mesh and

160 centrifuged to remove cellular material. The resulting supernatant was analysed for  
161 cytokine concentration using Legendplex bead-based multiplex immunoassays as  
162 per the manufacturer's instruction. Both cell phenotyping and the cytokine multiplex  
163 assays were analyzed using a BD FACSverse (BD Biosciences, San Jose, CA,  
164 USA). H&E and AB-PAS histological staining were performed by Massey IVABS  
165 histology unit.

## 166 **2.5 Real-time qPCR analysis**

167 Mouse lung tissue was collected 4 days following OVA challenge and snap frozen in  
168 liquid nitrogen. The lung samples were crushed into powder using a mortar and  
169 pestle with liquid nitrogen to keep the samples frozen. The RNA was extracted from  
170 the powder using a TRIZOL total RNA extraction protocol. RNA was quantified using  
171 an LVis plate in a POLARstar Omega plate reader (BMG) and the quality of the  
172 ribosomal RNA bands confirmed by agarose gel electrophoresis (data not shown).  
173 Five µg of RNA from each sample was used as the template for cDNA synthesis  
174 using the iScript™ cDNA Synthesis Kit. Taqman® Gene Expression Assays were  
175 purchased for each gene of interest. Two housekeeping genes, GAPDH and β-actin,  
176 were used as controls to determine the amount of relative gene expression.  
177 Taqman® Gene Expression Master Mix was used to PCR amplify the genes in a Bio-  
178 Rad™ CFX384™ Real-Time PCR Detection System. Three lung samples per  
179 treatment group were prepared and amplified in quadruplicate with the housekeeping  
180 genes amplified on the same 384-well plate.

## 181 **2.6 Statistical Analysis**



182 Data were analyzed using one-way analysis of variance (ANOVA) with a Tukey's  
183 post hoc test and graphed in SigmaPlot 12.5 (Systat Software Inc., San Jose, CA,  
184 USA).

### 185 **3. Results**

#### 186 **3.1 Chemical Composition of the Boysenberry and Apple Juice Concentrate**

187 The results of the LC-MS analysis showed that cyanidin glycosides, ellagitannins,  
188 and chlorogenic acid were the major components in BerriQi® Boysenberry and apple  
189 juice concentrate (Table 1, supplementary figures 1, 2). Minor components included  
190 phloretin 2-O-glucoside, and a mix of phenolic acids, flavonol glycosides, flavanol  
191 monomers and procyanidins. The major classes of phenolic compounds were  
192 anthocyanins (1969 µg/mL) and hydrolysable tannins (946 µg/mL), accounting for  
193 56% and 27%, respectively, of the total phenolics quantified. The most abundant  
194 tannins were ellagic acid (449 µg/mL) and sanguin H6 (213 µg/mL).

#### 195 **3.2 Effect of Boysenberry and Apple juice concentrate Intervention on** 196 **Ovalbumin-Induced Allergic Airways Inflammation**

197 Acute intranasal OVA exposure resulted in an infiltration of immune cells into the  
198 lung (Figure 1A) and increased mucous production (Figure 1B). Consumption of 2.5  
199 mg/kg TAC BerriQi® Boysenberry and apple juice concentrate reduced the  
200 infiltration of immune cells and decreased OVA-induced mucous production (Figure  
201 1A-B). We quantified the type and number of immune cells infiltrating into the lung,  
202 and found that acute OVA exposure significantly increased ( $P<0.001$ ) infiltrating  
203 eosinophils (CD45+/CD11b+/SiglecF+), neutrophils (CD45+Ly6C+Gr-1+) and T-cells  
204 (CD45+/CD3+/CD4+ or CD45+/CD3+/CD8a+), compared with the lung of naïve  
205 animals (Figure 1C-F). Compared with animals only exposed to OVA, those that also

206 consumed 2.5 mg/kg TAC BerriQi® Boysenberry and apple juice concentrate  
207 showed a significant decrease ( $P < 0.001$ ) in the number of infiltrating eosinophils,  
208 neutrophils and T cells in the lung (Figure 1C-F). We saw no change in the number  
209 of CD4+ or CD8+ T cells in the mediastinal (lung-draining) lymph node for any of the  
210 treatment groups (Figure 2A-B).

211 There was a trend towards an increased percentage of CD206+/CD14-  
212 macrophages in the lungs of mice that consumed 2.5 mg/kg TAC BerriQi®  
213 Boysenberry and apple juice concentrate (Figure 3A). We measured the gene  
214 expression of Arg1, Ym-1 and Fizz1 in lung tissue and found that 2.5 mg/kg TAC  
215 BerriQi® Boysenberry and apple juice concentrate consumption led to a significant  
216 fold- increase in Arg1 ( $P < 0.05$ ) and Fizz1 ( $P < 0.01$ ) gene expression compared to  
217 naïve mice (Table 2). We found no significant fold-change in Nos2 or Ym-1 gene  
218 expression between any of the treatment groups (Table 2).

219 Consumption of 2.5 mg/kg TAC BerriQi® Boysenberry and apple juice concentrate  
220 led to increased levels of the cytokines IL-17A, CXCL10, and CCL4 (Figure 3B-D) 4  
221 days following OVA challenge, but did not affect the IL-17F concentration (Figure  
222 3E). We saw no effect on the concentrations of the classical Th1/2 cytokines IFN $\gamma$ ,  
223 IL-5, IL-9 or IL-10 in either the BerriQi® Boysenberry and apple juice concentrate  
224 treated or the OVA alone mice compared to naïve controls (Figure 2C-F).

#### 225 **4. Discussion**

226 We evaluated the effects of dietary supplementation with 2.5 mg/kg TAC BerriQi®  
227 Boysenberry and apple juice concentrate, on the immune responses in a mouse  
228 model of acute allergic airways inflammation. Our results show that consumption of  
229 2.5 mg/kg TAC BerriQi® Boysenberry and apple juice concentrate reduced

230 granulocyte and local T cell infiltration into the lung after OVA challenge, but did not  
231 alter T cell activation within the lung draining lymph node or the levels of classical  
232 Th-2 and Th-1 cytokines in the lung at four days following OVA challenge. Our  
233 current results indicated that BerriQi® Boysenberry and apple juice concentrate had  
234 little impact on the Th-2/Th-1 mediated allergic response of mice, but rather targeted  
235 innate proinflammatory immune pathways. This is consistent with our previously  
236 reported finding in a mouse model of chronic allergic airways inflammation using 10  
237 mg/kg TAC Boysenberry juice concentrate (33). Chemical composition analysis  
238 showed that the BerriQi® Boysenberry and apple juice concentrate formulation  
239 contained high concentrations of cyanidin glycosides, ellagitannins, and chlorogenic  
240 acid. These compounds have been previously shown to reduce inflammatory  
241 signalling in vitro (38, 41, 42), and in vivo animal models of inflammation (34, 43-46).  
242 Our current results suggest that consumption of 2.5 mg/kg TAC BerriQi®  
243 Boysenberry and apple juice concentrate, which also contains high levels of  
244 ellagitannins and chlorogenic acid, could have broader lung health benefits beyond  
245 allergic asthma disease by promoting the resolution of inflammation caused by  
246 innate immune cell overactivation. Current asthma therapies also suppress both the  
247 adaptive and innate immune responses without affecting the aberrant sensitivity to  
248 the allergen and this can lead to adverse events.

249 Consumption of BerriQi® Boysenberry and apple juice concentrate had less of an  
250 effect on monocyte/macrophage infiltration into the lung than on granulocyte  
251 infiltration, and there was increased percentage of CD206+ monocytes. This could  
252 represent a shift to an M2 anti-inflammatory phenotype. We then measured the  
253 changes in gene expression for Arg1, Ym-1 and Fizz1, the classic genes for  
254 identifying alternatively activated macrophages (47, 48). Arg1 and Fizz1 gene

255 expression was significantly increased with BerriQi® Boysenberry and apple juice  
256 concentrate consumption. Consistent with a shift to a more anti-inflammatory  
257 macrophage phenotype, we detected increased levels of CXCL10 and CCL4  
258 cytokines, which are produced by M2 macrophages, in the lungs of mice that  
259 consumed BerriQi® Boysenberry and apple juice concentrate. These results suggest  
260 that the consumption of Boysenberry and apple juice concentrate led to a switch to  
261 the M2 phenotype in OVA-challenged mice. This could be one of the mechanisms by  
262 which BerriQi® Boysenberry and apple juice concentrate consumption contributed to  
263 the resolution of inflammation. Previously, we reported that 10 mg/kg TAC  
264 Boysenberry juice concentrate can increase the abundance of alternatively activated  
265 (M2) macrophages, which promote tissue repair in a chronic model of airways  
266 inflammation (33). Our current results suggest that BerriQi® Boysenberry and apple  
267 juice concentrate, had a similar effect in this mouse model of acute inflammation, in  
268 particular the increase in Arg1 gene expression is similar to our previously reported  
269 study showing increased arginase protein expression by alternatively activated  
270 macrophages (33). Further, research looking at an animal model Th2-mediated  
271 inflammation has identified M2 macrophage derived Fizz1 as a key limiting factor for  
272 Th2-mediated pulmonary inflammation (49).

273 The mice that consumed 2.5 mg/kg TAC BerriQi® Boysenberry and apple juice  
274 concentrate showed increased levels of the cytokines IL-17A, CXCL10, and CCL4,  
275 but the levels of IL-17F were not affected. High IL-17 and IL-17F levels have been  
276 implicated in asthma pathogenesis, however, there is also evidence that IL-17A (50)  
277 can increase the abundance of MMP-9, an important tissue remodelling protein in  
278 asthma (33) as well as inducing apoptosis of neutrophils and eosinophils (50).  
279 CXCL10 and CCL4 are chemokines that attract monocytes/macrophages, and

280 CXCL10 may also inhibit the infiltration of eosinophils in response to allergic airways  
281 inflammation (51). The combination of increased IL-17A-mediated granulocyte  
282 apoptosis and CXCL10-mediated inhibition of granulocyte infiltration could explain  
283 how the consumption of the BerriQi® Boysenberry and apple juice concentrate  
284 resulted in decreased allergic airways inflammation, in particular the reduced number  
285 of eosinophils and neutrophils.

286 This switch to a M2 macrophage phenotype may be through the Boysenberry and  
287 apple polyphenols identified in the BerriQi® Boysenberry and apple juice concentrate  
288 directly inhibiting proinflammatory pathways, or through an indirect shortening of the  
289 proinflammatory phase. Other studies have shown that increased dietary fibre  
290 shortened the duration of the proinflammatory phase, leading to reduced tissue  
291 damage in a chronic mouse model of allergic asthma (52). Based on the estimated  
292 fibre content in BerriQi® Boysenberry and apple juice concentrate (Supplementary  
293 table 1), it is unlikely that the dietary fibre component played a significant role in the  
294 immune modulation we observed. However, the combination of anthocyanins with  
295 other polyphenols identified in the BerriQi® Boysenberry and apple juice concentrate  
296 could have a similar effect on inflammation either by shortening the proinflammatory  
297 time course, or promoting the production of anti-inflammatory proteins. Ellagitannins  
298 have been shown in cell culture and animal models of chronic inflammatory diseases  
299 to reduce proinflammatory prostaglandins (53), cytokines (45, 54), and other proteins  
300 (42, 55, 56). Anthocyanins have also been shown to inhibit proinflammatory proteins  
301 (57, 58), and activate anti-inflammatory pathways in models of inflammation (59-63).  
302 It is possible that the combination of the different polyphenols in the BerriQi®  
303 Boysenberry and apple juice concentrate act on a number of different immune  
304 pathways to regulate the immune responses to OVA.

305 We found that mice that consumed BerriQi® Boysenberry and apple juice  
306 concentrate had reduced immune cell infiltration in response to acute OVA challenge  
307 and this could be as a result of a shift towards an anti-inflammatory environment  
308 within the lung. These results highlight the potential of anthocyanin-rich Boysenberry  
309 and apple dietary supplementation to modulate innate immune pathways during  
310 acute allergic lung inflammation. Further work is needed to determine if these  
311 pathways are also altered in other lung inflammatory conditions, such as air pollution  
312 exposure. Clinical studies are needed to show if these findings are translatable to  
313 human health.

## 314 **Conflict of Interest**

315 All authors were employed by The New Zealand Institute of Plant & Food Research  
316 Limited, a New Zealand Crown Research Institute wholly owned by the New Zealand  
317 Government for the purposes of research into sustainable production, elite breeding,  
318 food and health science of horticultural, arable, and seafood products.

319 OMS and RDH report that they are named on patents related to the formulation of  
320 BerriQi® Boysenberry and apple juice concentrate, but have not received any  
321 financial compensation, nor will receive any personal royalty payments as a result of  
322 this. None of the other authors declare any other conflicts of interest. Under the  
323 terms of the Innovation Cell™ Collaboration Agreement Plant & Food Research and  
324 Anagenix have a royalty sharing agreement for any royalties that result from the sale  
325 of BerriQi® Boysenberry and apple juice concentrate product.

## 326 **Author Contributions**

327 OMS designed, performed, analyzed and interpreted the in vivo studies, and wrote  
328 and edited the manuscript; JC performed, analyzed and interpreted the chemical  
329 composition experiments and GMS performed, analyzed and interpreted in vivo  
330 studies, and both contributed to the writing and editing of the manuscript; HD and  
331 SM performed the in vivo studies and helped edit the manuscript; RDH designed and  
332 directed the overall research programme and helped edit the manuscript.

## 333 **Funding**

334 This work was funded by The New Zealand Institute of Plant & Food Research  
335 Limited as a contribution to the Innovation Cell™ Collaboration Agreement executed  
336 between Anagenix Limited and The New Zealand Institute for Plant and Food  
337 Research Limited on 5 September 2016 (PFR reference #33609).

338 The authors declare that this study received funding from The New Zealand Institute  
339 of Plant & Food Research Limited. The funder was not involved in the study design,  
340 collection, analysis, and interpretation of data, the writing of this article or the  
341 decision to submit it for publication.

## 342 **Acknowledgements**

343 The authors acknowledge the efforts of TC Chadderton, and Brendan Vercoe in  
344 securing internal funding for this work. The authors would like to thank Andrew  
345 Carroll for assisting with data analysis and Jenny Smith for her invaluable help  
346 preparing the manuscript.

## 347 **5. References**

- 348 1. Agache I, Akdis CA. Endotypes of allergic diseases and asthma: An important  
349 step in building blocks for the future of precision medicine. *Allergol Int.*  
350 2016;65(3):243-52.
- 351 2. Agrawal DK, Bharadwaj A. Allergic airway inflammation. *Curr Allergy Asthma*  
352 *Rep.* 2005;5(2):142-8.
- 353 3. Barnes PJ. Pathophysiology of asthma. *Br J Clin Pharmacol.* 1996;42(1):3-10.
- 354 4. WHO. Prevention of allergy and allergic asthma: based on the WHO/WAO  
355 Meeting on the Prevention of Allergy and Allergic Asthma, Geneva, 8-9 January  
356 2002. Management DoND, Arthritis CRDa, Organization WA, Organization. WH,  
357 editors. Geneva: World Health Organization; 2003.
- 358 5. Hsu HH, Chiu YH, Coull BA, Kloog I, Schwartz J, Lee A, et al. Prenatal  
359 Particulate Air Pollution and Asthma Onset in Urban Children. Identifying Sensitive  
360 Windows and Sex Differences. *Am J Respir Crit Care Med.* 2015;192(9):1052-9.



- 361 6. Miller RL, Peden DB. Environmental effects on immune responses in patients  
362 with atopy and asthma. *J Allergy Clin Immunol.* 2014;134(5):1001-8.
- 363 7. Jung DY, Leem JH, Kim HC, Kim JH, Hwang SS, Lee JY, et al. Effect of  
364 Traffic-Related Air Pollution on Allergic Disease: Results of the Children's Health and  
365 Environmental Research. *Allergy Asthma Immunol Res.* 2015;7(4):359-66.
- 366 8. Hoek G, Pattenden S, Willers S, Antova T, Fabianova E, Braun-Fahrlander C,  
367 et al. PM<sub>10</sub>, and children's respiratory symptoms and lung function in the PATY  
368 study. *Eur Respir J.* 2012;40(3):538-47.
- 369 9. Acciani TH, Brandt EB, Khurana Hershey GK, Le Cras TD. Diesel exhaust  
370 particle exposure increases severity of allergic asthma in young mice. *Clin Exp*  
371 *Allergy.* 2013;43(12):1406-18.
- 372 10. Brandt EB, Biagini Myers JM, Acciani TH, Ryan PH, Sivaprasad U, Ruff B, et  
373 al. Exposure to allergen and diesel exhaust particles potentiates secondary allergen-  
374 specific memory responses, promoting asthma susceptibility. *J Allergy Clin Immunol.*  
375 2015;136(2):295-303 e7.
- 376 11. Carlsten C, Blomberg A, Pui M, Sandstrom T, Wong SW, Alexis N, et al.  
377 Diesel exhaust augments allergen-induced lower airway inflammation in allergic  
378 individuals: a controlled human exposure study. *Thorax.* 2016;71(1):35-44.
- 379 12. Kim J, Natarajan S, Vaickus LJ, Bouchard JC, Beal D, Cruikshank WW, et al.  
380 Diesel exhaust particulates exacerbate asthma-like inflammation by increasing CXC  
381 chemokines. *Am J Pathol.* 2011;179(6):2730-9.
- 382 13. van Voorhis M, Knopp S, Julliard W, Fechner JH, Zhang X, Schauer JJ, et al.  
383 Exposure to atmospheric particulate matter enhances Th17 polarization through the  
384 aryl hydrocarbon receptor. *PLoS One.* 2013;8(12):e82545.

- 385 14. Trivedi SG, Lloyd CM. Eosinophils in the pathogenesis of allergic airways  
386 disease. *Cell Mol Life Sci.* 2007;64(10):1269-89.
- 387 15. Amin K, Janson C, Bystrom J. Role of Eosinophil Granulocytes in Allergic  
388 Airway Inflammation Endotypes. *Scand J Immunol.* 2016;84(2):75-85.
- 389 16. Bossley CJ, Fleming L, Gupta A, Regamey N, Frith J, Oates T, et al. Pediatric  
390 severe asthma is characterized by eosinophilia and remodeling without T(H)2  
391 cytokines. *J Allergy Clin Immunol.* 2012;129(4):974-82 e13.
- 392 17. Brown JR, Kleimberg J, Marini M, Sun G, Bellini A, Mattoli S. Kinetics of  
393 eotaxin expression and its relationship to eosinophil accumulation and activation in  
394 bronchial biopsies and bronchoalveolar lavage (BAL) of asthmatic patients after  
395 allergen inhalation. *Clin Exp Immunol.* 1998;114(2):137-46.
- 396 18. Bergeron C, Al-Ramli W, Hamid Q. Remodeling in asthma. *Proc Am Thorac*  
397 *Soc.* 2009;6(3):301-5.
- 398 19. Ahdieh M, Vandebos T, Youakim A. Lung epithelial barrier function and  
399 wound healing are decreased by IL-4 and IL-13 and enhanced by IFN-gamma. *Am J*  
400 *Physiol Cell Physiol.* 2001;281(6):C2029-38.
- 401 20. Al-Muhsen S, Johnson JR, Hamid Q. Remodeling in asthma. *J Allergy Clin*  
402 *Immunol.* 2011;128(3):451-62.
- 403 21. Brightling CE, Gupta S, Gonem S, Siddiqui S. Lung damage and airway  
404 remodelling in severe asthma. *Clin Exp Allergy.* 2012;42(5):638-49.
- 405 22. McKeever TM, Britton J. Diet and asthma. *Am J Respir Crit Care Med.*  
406 2004;170(7):725-9.
- 407 23. Nurmatov U, Devereux G, Sheikh A. Nutrients and foods for the primary  
408 prevention of asthma and allergy: systematic review and meta-analysis. *J Allergy*  
409 *Clin Immunol.* 2011;127(3):724-33 e1-30.

- 410 24. Okoko BJ, Burney PG, Newson RB, Potts JF, Shaheen SO. Childhood  
411 asthma and fruit consumption. *Eur Respir J.* 2007;29(6):1161-8.
- 412 25. Rosenlund H, Kull I, Pershagen G, Wolk A, Wickman M, Bergstrom A. Fruit  
413 and vegetable consumption in relation to allergy: disease-related modification of  
414 consumption? *J Allergy Clin Immunol.* 2011;127(5):1219-25.
- 415 26. Stevens EL, Rosser F, Forno E, Peden D, Celedon JC. Can the effects of  
416 outdoor air pollution on asthma be mitigated? *J Allergy Clin Immunol.*  
417 2019;143(6):2016-8 e1.
- 418 27. Burbank AJ, Duran CG, Pan Y, Burns P, Jones S, Jiang Q, et al. Gamma  
419 tocopherol-enriched supplement reduces sputum eosinophilia and endotoxin-  
420 induced sputum neutrophilia in volunteers with asthma. *J Allergy Clin Immunol.*  
421 2018;141(4):1231-8 e1.
- 422 28. Pounis G, Arcari A, Costanzo S, Di Castelnuovo A, Bonaccio M, Persichillo M,  
423 et al. Favorable association of polyphenol-rich diets with lung function: Cross-  
424 sectional findings from the Moli-sani study. *Respir Med.* 2018;136:48-57.
- 425 29. Park SJ, Shin WH, Seo JW, Kim EJ. Anthocyanins inhibit airway inflammation  
426 and hyperresponsiveness in a murine asthma model. *Food Chem Toxicol.*  
427 2007;45(8):1459-67.
- 428 30. Coleman SL, Shaw OM. Progress in the understanding of the pathology of  
429 allergic asthma and the potential of fruit proanthocyanidins as modulators of airway  
430 inflammation. *Food Funct.* 2017;8(12):4315-24.
- 431 31. Coleman S, Kruger M, Sawyer G, Hurst R. Procyanidin A2 Modulates IL-4-  
432 Induced CCL26 Production in Human Alveolar Epithelial Cells. *Int J Mol Sci.*  
433 2016;17(11):1888.

- 434 32. Sawyer GM, Stevenson DE, McGhie TK, Hurst RD. Suppression of CCL26  
435 and CCL11 generation in human alveolar epithelial cells by apple extracts containing  
436 procyanidins. *J Funct Foods*. 2017;31:141-51.
- 437 33. Shaw OM, Hurst RD, Harper JL. Boysenberry ingestion supports fibrolytic  
438 macrophages with the capacity to ameliorate chronic lung remodeling. *Am J Physiol*  
439 *Lung Cell Mol Physiol*. 2016;311(3):L628-38.
- 440 34. Shaw OM, Nyanhanda T, McGhie TK, Harper JL, Hurst RD. Blackcurrant  
441 anthocyanins modulate CCL11 secretion and suppress allergic airway inflammation.  
442 *Mol Nutr Food Res*. 2017;61(9):1600868.
- 443 35. Garcia-Larsen V, Thawer N, Charles D, Cassidy A, van Zele T, Thilsing T, et  
444 al. Dietary Intake of Flavonoids and Ventilatory Function in European Adults: A  
445 GA(2)LEN Study. *Nutrients*. 2018;10(1).
- 446 36. Garcia V, Arts IC, Sterne JA, Thompson RL, Shaheen SO. Dietary intake of  
447 flavonoids and asthma in adults. *Eur Respir J*. 2005;26(3):449-52.
- 448 37. Cooney JM, Jensen DJ, McGhie TK. LC-MS identification of anthocyanins in  
449 boysenberry extract and anthocyanin metabolites in human urine following dosing. *J*  
450 *Sci Food Agr*. 2004;84(3):237-45.
- 451 38. McGhie TK, Martin H, Lunken RC. The combination of analytical-scale HPLC  
452 separation with a TR-FRET assay to investigate JAK2 inhibitory compounds in a  
453 Boysenberry drink. *Food Funct*. 2012;3(11):1170-5.
- 454 39. Coleman SL, Hurst RD, Sawyer GM, Kruger MC. The in vitro evaluation of  
455 isolated procyanidins as modulators of cytokine-induced eotaxin production in  
456 human alveolar epithelial cells. *J Berry Res*. 2016;6(2):115-24.
- 457 40. Shaw OM, Harper JL. An efficient single prime protocol for the induction of  
458 antigen-induced airways inflammation. *J Immunol Methods*. 2013;395(1-2):79-82.

- 459 41. Cassidy A, Rogers G, Peterson JJ, Dwyer JT, Lin H, Jacques PF. Higher  
460 dietary anthocyanin and flavonol intakes are associated with anti-inflammatory  
461 effects in a population of US adults. *Am J Clin Nutr.* 2015;102(1):172-81.
- 462 42. El-Shitany NA, El-Bastawissy EA, El-desoky K. Ellagic acid protects against  
463 carrageenan-induced acute inflammation through inhibition of nuclear factor kappa  
464 B, inducible cyclooxygenase and proinflammatory cytokines and enhancement of  
465 interleukin-10 via an antioxidant mechanism. *Int Immunopharmacol.* 2014;19(2):290-  
466 9.
- 467 43. Auclair S, Silberberg M, Gueux E, Morand C, Mazur A, Milenkovic D, et al.  
468 Apple polyphenols and fibers attenuate atherosclerosis in apolipoprotein E-deficient  
469 mice. *J Agric Food Chem.* 2008;56(14):5558-63.
- 470 44. Denis MC, Roy D, Yeganeh PR, Desjardins Y, Varin T, Haddad N, et al. Apple  
471 peel polyphenols: a key player in the prevention and treatment of experimental  
472 inflammatory bowel disease. *Clin Sci (Lond).* 2016;130(23):2217-37.
- 473 45. Guan S, Zheng YY, Yu X, Li WL, Han B, Lu J. Ellagic acid protects against  
474 LPS-induced acute lung injury through inhibition of nuclear factor kappa B,  
475 proinflammatory cytokines and enhancement of interleukin-10. *Food Agr Immunol.*  
476 2017;28(6):1347-61.
- 477 46. Impellizzeri D, Talero E, Siracusa R, Alcaide A, Cordaro M, Maria Zubelia J,  
478 et al. Protective effect of polyphenols in an inflammatory process associated with  
479 experimental pulmonary fibrosis in mice. *Br J Nutr.* 2015;114(6):853-65.
- 480 47. Chung S, Lee TJ, Reader BF, Kim JY, Lee YG, Park GY, et al. FoxO1  
481 regulates allergic asthmatic inflammation through regulating polarization of the  
482 macrophage inflammatory phenotype. *Oncotarget.* 2016;7(14):17532-46.

- 483 48. Kurowska-Stolarska M, Stolarski B, Kewin P, Murphy G, Corrigan CJ, Ying S,  
484 et al. IL-33 amplifies the polarization of alternatively activated macrophages that  
485 contribute to airway inflammation. *J Immunol*. 2009;183(10):6469-77.
- 486 49. Nair MG, Du Y, Perrigoue JG, Zaph C, Taylor JJ, Goldschmidt M, et al.  
487 Alternatively activated macrophage-derived RELM- $\alpha$  is a negative regulator of  
488 type 2 inflammation in the lung. *J Exp Med*. 2009;206(4):937-52.
- 489 50. Linden A, Dahlen B. Interleukin-17 cytokine signalling in patients with asthma.  
490 *Eur Respir J*. 2014;44(5):1319-31.
- 491 51. Su YC, Rolph MS, Hansbro NG, Mackay CR, Sewell WA. Granulocyte-  
492 macrophage colony-stimulating factor is required for bronchial eosinophilia in a  
493 murine model of allergic airway inflammation. *J Immunol*. 2008;180(4):2600-7.
- 494 52. Trompette A, Gollwitzer ES, Yadava K, Sichelstiel AK, Sprenger N, Ngom-Bru  
495 C, et al. Gut microbiota metabolism of dietary fiber influences allergic airway disease  
496 and hematopoiesis. *Nat Med*. 2014;20(2):159-66.
- 497 53. Karlsson S, Nanberg E, Fjaeraa C, Wijkander J. Ellagic acid inhibits  
498 lipopolysaccharide-induced expression of enzymes involved in the synthesis of  
499 prostaglandin E2 in human monocytes. *Br J Nutr*. 2010;103(8):1102-9.
- 500 54. Cornelio Favarin D, Martins Teixeira M, Lemos de Andrade E, de Freitas  
501 Alves C, Lazo Chica JE, Arterio Sorgi C, et al. Anti-inflammatory effects of ellagic  
502 acid on acute lung injury induced by acid in mice. *Mediators Inflamm*.  
503 2013;2013:164202.
- 504 55. Marin M, Maria Giner R, Rios JL, Recio MC. Intestinal anti-inflammatory  
505 activity of ellagic acid in the acute and chronic dextrane sulfate sodium models of  
506 mice colitis. *J Ethnopharmacol*. 2013;150(3):925-34.

- 507 56. Saba, Khan S, Parvez S, Chaudhari B, Ahmad F, Anjum S, et al. Ellagic acid  
508 attenuates bleomycin and cyclophosphamide-induced pulmonary toxicity in Wistar  
509 rats. *Food Chem Toxicol.* 2013;58:210-9.
- 510 57. Esposito D, Chen A, Grace MH, Komarnytsky S, Lila MA. Inhibitory effects of  
511 wild blueberry anthocyanins and other flavonoids on biomarkers of acute and chronic  
512 inflammation in vitro. *J Agric Food Chem.* 2014;62(29):7022-8.
- 513 58. Fu Y, Zhou E, Wei Z, Wang W, Wang T, Yang Z, et al. Cyanidin-3-O-beta-  
514 glucoside ameliorates lipopolysaccharide-induced acute lung injury by reducing  
515 TLR4 recruitment into lipid rafts. *Biochem Pharmacol.* 2014;90(2):126-34.
- 516 59. Chen YF, Shibu MA, Fan MJ, Chen MC, Viswanadha VP, Lin YL, et al. Purple  
517 rice anthocyanin extract protects cardiac function in STZ-induced diabetes rat hearts  
518 by inhibiting cardiac hypertrophy and fibrosis. *J Nutr Biochem.* 2016;31:98-105.
- 519 60. Edirisinghe I, Banaszewski K, Cappozzo J, McCarthy D, Burton-Freeman BM.  
520 Effect of black currant anthocyanins on the activation of endothelial nitric oxide  
521 synthase (eNOS) in vitro in human endothelial cells. *J Agric Food Chem.*  
522 2011;59(16):8616-24.
- 523 61. Khanna S, Roy S, Bagchi D, Bagchi M, Sen CK. Upregulation of oxidant-  
524 induced VEGF expression in cultured keratinocytes by a grape seed  
525 proanthocyanidin extract. *Free Radic Biol Med.* 2001;31(1):38-42.
- 526 62. Koh ES, Lim JH, Kim MY, Chung S, Shin SJ, Choi BS, et al. Anthocyanin-rich  
527 *Seoritae* extract ameliorates renal lipotoxicity via activation of AMP-activated protein  
528 kinase in diabetic mice. *J Transl Med.* 2015;13(1):203.
- 529 63. Liu Y, Tan D, Tong C, Zhang Y, Xu Y, Liu X, et al. Blueberry anthocyanins  
530 ameliorate radiation-induced lung injury through the protein kinase RNA-activated  
531 pathway. *Chem Biol Interact.* 2015;242:363-71.

532 **Table 1. Phenolic compounds detected in BerriQi® ( $\mu\text{g/mL}$ ).**  $\text{M}^+$  and  $(\text{M}-\text{H})^-$  ions  
 533 are the pseudomolecular ions used for identification of compounds by liquid  
 534 chromatography-mass spectrometry (LC-MS). All identifications confirmed by  
 535 MS/MS<sup>n</sup> experiments. Peak numbers refer to chromatograms shown in  
 536 supplementary data. # detected as  $[\text{M}+\text{formate}]^-$  adduct

| Peak                                 | $\text{M}^+$ | $(\text{M}-\text{H})^-$ | Compound                            | $\mu\text{g/mL}$ |
|--------------------------------------|--------------|-------------------------|-------------------------------------|------------------|
| <b>Anthocyanins</b>                  |              |                         |                                     |                  |
| 1                                    | 611          |                         | Cyanidin 3-O-sophoroside            | 883              |
| 2                                    | 449          |                         | Cyanidin 3-O-glucoside              | 571              |
| 3                                    | 481          |                         | Cyanidin 3-O-sambubioside           | 24               |
| 4                                    | 757          |                         | Cyanidin 3-O-(2-glucosylrutinoside) | 411              |
| 5                                    | 595          |                         | Cyanidin 3-O-rutinoside             | 62               |
| 6                                    | 727          |                         | Cyanidin 3-O-xylosylrutinoside      | 18               |
| <b>Phenolic acids</b>                |              |                         |                                     |                  |
| 7                                    |              | 169                     | Gallic acid                         | 140              |
| 8                                    |              | 153                     | Protocatechuric acid                | 35               |
| 10                                   |              | 353                     | Chlorogenic acid                    | 69               |
| 11                                   |              | 179                     | Caffeic acid                        | 7                |
| 15                                   |              | 337                     | 4- <i>p</i> -Coumaroylquinic acid   | 26               |
| 17                                   |              | 337                     | 5- <i>p</i> -Coumaroylquinic acid   | 3                |
| <b>Flavan-3-ols and procyanidins</b> |              |                         |                                     |                  |
| 9                                    |              | 335 <sup>#</sup>        | Catechin                            | 3                |
| 12                                   |              | 577                     | Procyanidin B2                      | 6                |
| 13                                   |              | 335 <sup>#</sup>        | <i>Epi</i> -catechin                | 21               |
| 25                                   |              | 579                     | unknown procyanidin isomer          | 3                |
| <b>Hydrolysable tannins</b>          |              |                         |                                     |                  |
| 14                                   |              | 1567                    | Sanguiin H10 isomer 1               | 9                |
| 16                                   |              | 469                     | Sanguisorbic acid dilactone         | 120              |
| 19                                   |              | 2036.5                  | Galloyl-SH6                         | 66               |
| 20                                   |              | 1567                    | Sanguiin H10 isomer 2               | 61               |
| 21                                   |              | 2501                    | Lambertian C (minus ellagic acid)   | 11               |
| 22                                   |              | 2803                    | Lambertian C                        | 17               |
| 24                                   |              | 1869                    | Sanguiin H6                         | 213              |
| 26                                   |              | 301                     | Ellagic acid                        | 449              |
| <b>Flavonols</b>                     |              |                         |                                     |                  |
| 27                                   |              | 609                     | Quercetin 3-O-rutinoside            | 6                |
| 28                                   |              | 463                     | Quercetin 3-O-galactoside           | 17               |



|                  |                  |                              |             |
|------------------|------------------|------------------------------|-------------|
| 29               | 477              | Quercetin 3-O-glucuronide    | 36          |
| 30               | 463              | Quercetin 3-O-glucoside      | 13          |
| 31               | 433              | Quercetin 3-O-pentoside 1    | 9           |
| 32               | 433              | Quercetin 3-O-pentoside 3    | 6           |
| 33               | 433              | Quercetin 3-O-pentoside 2    | 13          |
| 35               | 447              | Quercetin 3-O-rhamnoside     | 15          |
| 37               | 301              | Quercetin                    | 19          |
| <b>Chalcones</b> |                  |                              |             |
| 34               | 567              | Phloretin 2-O-xylo-glucoside | 9           |
| 36               | 481 <sup>#</sup> | Phloretin 2-O-glucoside      | 62          |
| <b>Unknowns</b>  |                  |                              |             |
| 18               | 563 <sup>#</sup> | unknown                      | 71          |
| 23               | 639              | unknown                      | 22          |
| <b>Total</b>     |                  |                              | <b>1557</b> |

537

538 **Table 2: BerriQi® Boysenberry and apple juice concentrate increases**  
 539 **alternatively activated macrophage gene expression in the lung.** Mice were  
 540 primed with ovalbumin (OVA)/Alum i.p. and then challenged 7 days later with OVA  
 541 i.n. (Day 0). Mice were orally gavaged with 2.5 mg/kg total anthocyanins (TAC) in the  
 542 BerriQi® Boysenberry and apple juice concentrate (BerriQi) 1h before OVA  
 543 challenge and again 2 days post-challenge. Mean fold-change (SEM) in gene  
 544 expression was measured by real-time qPCR in lung tissue 4 days post-OVA  
 545 challenge. \*P<0.05, \*\*P<0.01 compared with naïve (one-way ANOVA with Tukey's  
 546 Post Hoc test) for 4 experimental replicates with n=3 per treatment groups.

| Target Gene  | Naïve   | OVA           | OVA + BerriQi |
|--------------|---------|---------------|---------------|
| <b>Arg1</b>  | 1 (0.5) | 9.4 (5.3)     | 26.0 (7.9) *  |
| <b>Ym-1</b>  | 1 (0.4) | 4.4 (1.9)     | 5.5 (1.0)     |
| <b>Fizz1</b> | 1 (0.5) | 15.4 (0.9) ** | 19.6 (3.3) ** |
| <b>Nos2</b>  | 1 (0.3) | 1.5 (0.8)     | 1.7 (0.5)     |

547

548 **Figure 1: BerriQi® Boysenberry and apple juice concentrate suppresses**  
549 **ovalbumin-induced airway inflammation, and immune cell infiltration.** Mice  
550 were primed with ovalbumin (OVA)/Alum i.p and then challenged 7 days later with  
551 OVA i.n (Day 0). Mice were orally gavaged with 2.5 mg/kg total anthocyanins (TAC)  
552 in the BerriQi® Boysenberry and apple juice concentrate (BerriQi) 1h before OVA  
553 challenge and again 2 days post-challenge. (A) Haematoxylin and eosin stained lung  
554 tissue from naïve, OVA-challenged and OVA-challenged mice treated with BerriQi®  
555 Boysenberry and apple juice concentrate. Magnification 10x (top) and 20x (bottom)  
556 Asterisk =cell infiltration. (B) Alcian-blue Periodic acid-Schiff stained lung tissue from  
557 naïve, OVA-challenged and OVA-challenged mice treated with BerriQi®  
558 Boysenberry and apple juice concentrate. Magnification 10x (top) and 20x (bottom).  
559 Arrow=mucous producing goblet cells. (C) Total eosinophil, (D) Total neutrophil, (E)  
560 CD4+ T cells and CD8+ T cells in bronchioalveolar lavage fluid (BALF) were  
561 determined 4 days post-OVA challenge. Data presented as mean  $\pm$  SEM  $P < 0.001$   
562 compared with naïve and OVA challenge + BerriQi® Boysenberry and apple juice  
563 concentrate (one-way ANOVA with Tukey's Post Hoc test) for two experimental  
564 replicates with  $n=10$  per treatment groups.

565 **Figure 2: BerriQi® Boysenberry and apple juice concentrate does not alter**  
566 **classical Th-1/Th-2 cells and cytokines.** Mice were primed with ovalbumin  
567 (OVA)/Alum i.p and then challenged 7 days later with OVA i.n (Day 0). Mice were  
568 orally gavaged with 2.5 mg/kg total anthocyanins (TAC) in the BerriQi® Boysenberry  
569 and apple juice concentrate (BerriQi) 1h before OVA challenge and again 2 days  
570 post-challenge. Mediastinal lymph node (MSLN) (A) CD4+ and (B) CD8+ T cells  
571 number; and lung tissue production of (C) IL-5, (D) IL-9, (E) IL-10 and (F) IFN $\gamma$  were

572 determined 4 days post-OVA challenge by Legendplex. Data presented as mean  $\pm$   
573 SEM for two experimental replicates with n=10 per treatment groups.

574 **Figure 3: BerriQi® Boysenberry and apple juice concentrate suppresses**  
575 **ovalbumin-induced airway inflammation through increased IL-17A, CXCL10**  
576 **and CCL4 concentration.** Mice were primed with ovalbumin (OVA)/Alum i.p and  
577 then challenged 7 days later with OVA i.n (Day 0). Mice were orally gavaged with 2.5  
578 mg/kg total anthocyanins (TAC) in the BerriQi® Boysenberry and apple juice  
579 concentrate (BerriQi) 1h before OVA challenge and again 2 days post-challenge. (A)  
580 Percentage of CD206+ macrophages in bronchioalveolar lavage fluid (BALF) and  
581 lung tissue production of (B) CXCL10, (C) IL-17A, (D) CCL4 and (E) IL-17F was  
582 determined 4 days post-OVA challenge by Legendplex. Data presented as mean  $\pm$   
583 SEM, P<0.05 compared with OVA challenge + BerriQi® Boysenberry and apple juice  
584 concentrate, P<0.01 compared with naïve and OVA challenge (one-way ANOVA with  
585 Tukey's Post Hoc test) for two experimental replicates with n=10 per treatment  
586 groups.

587

588 **SUPPLEMENTARY DATA**

589

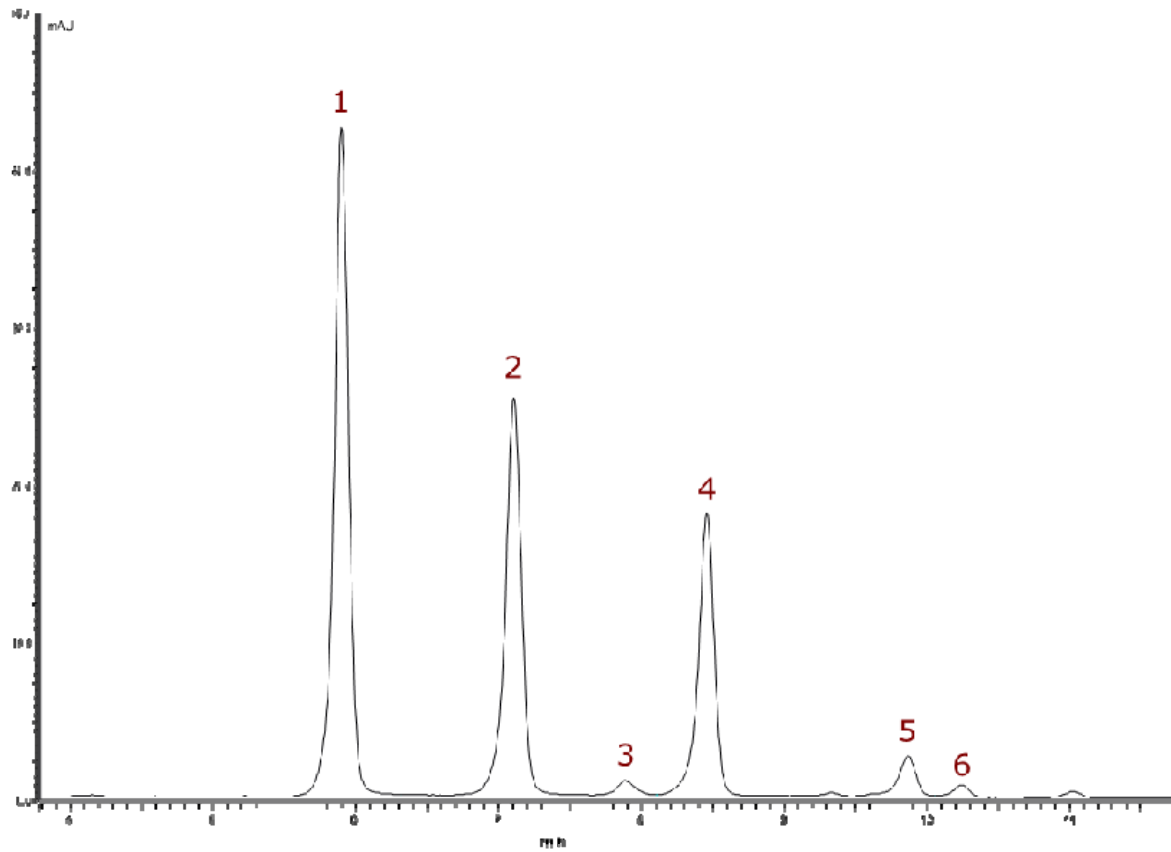

591 **Supplementary Figure 1.** Liquid Chromatography-Mass Spectrometry (LC-MS)  
592 chromatogram for BerriQi® concentrate, showing the anthocyanin UV/VIS profile  
593 measured at 520 nm. Peak numbers refer to compounds listed in Table 1.

594

595

596

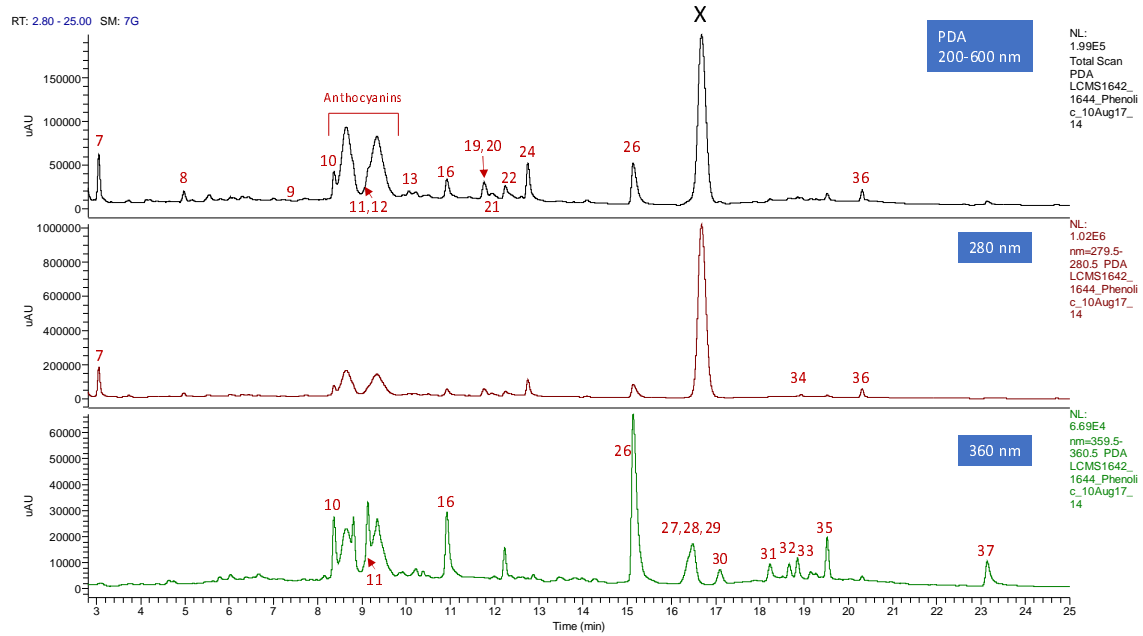

597

598 **Supplementary Figure 2.** Liquid Chromatography-Mass Spectrometry (LC-MS)  
599 chromatograms for BerriQi® concentrate, showing PDA (photodiode array) phenolic  
600 profiles measured at 200–600 nm, 280 nm and 360 nm. Peak numbers refer to  
601 compounds listed in Table 1. X, denotes sorbic acid, a preservative added to the  
602 BerriQi concentrate during formulation. This was present at a concentration of ~2000  
603 µg/mL.

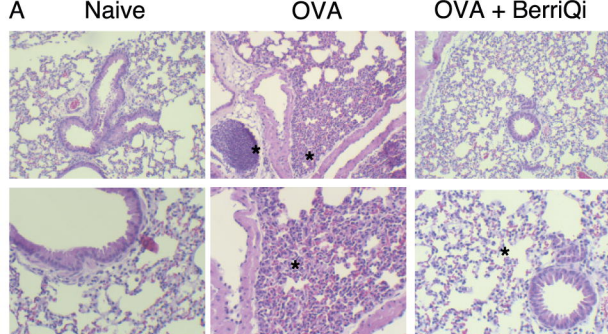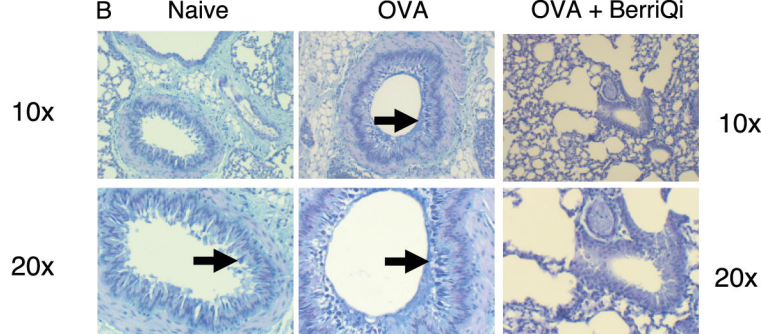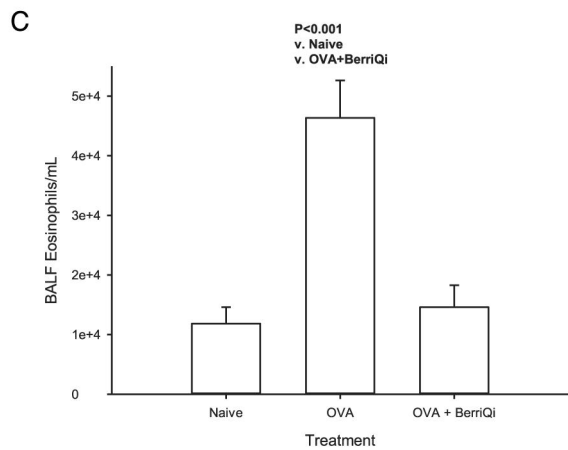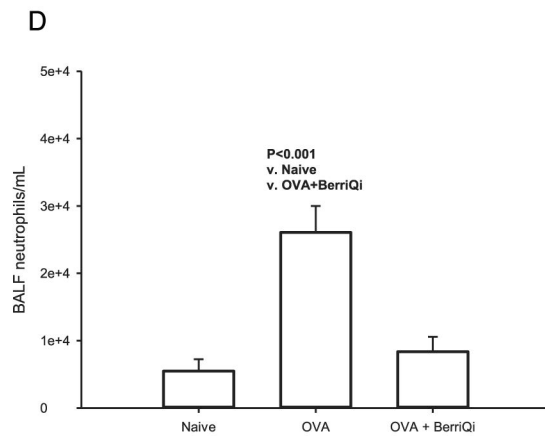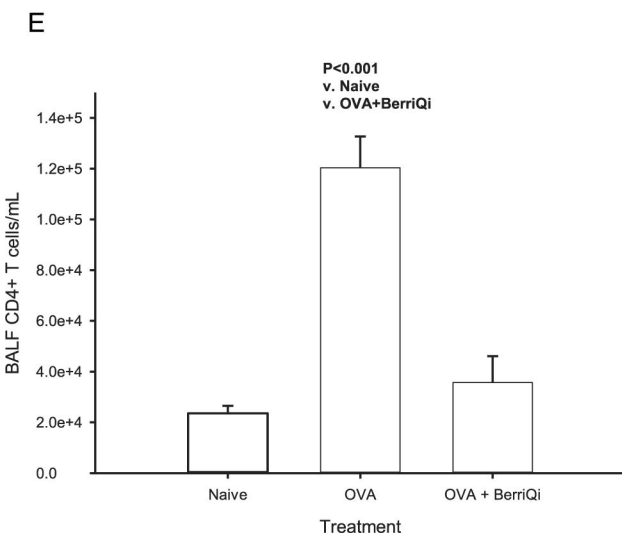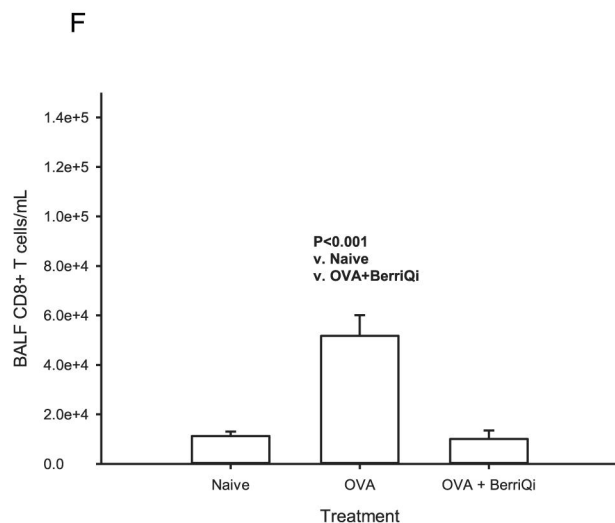

**A**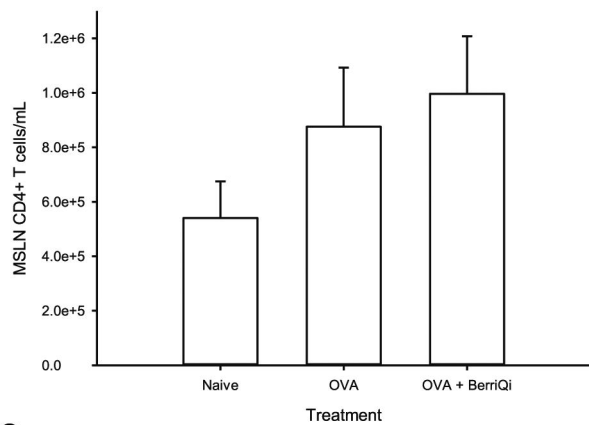**B**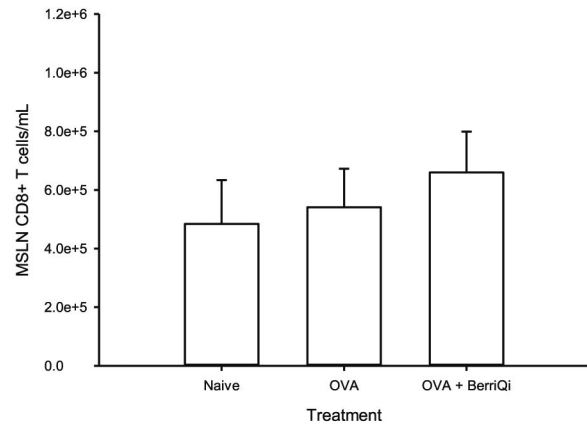**C**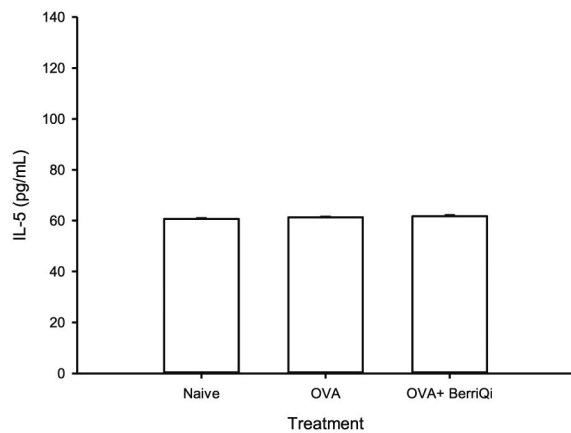**D**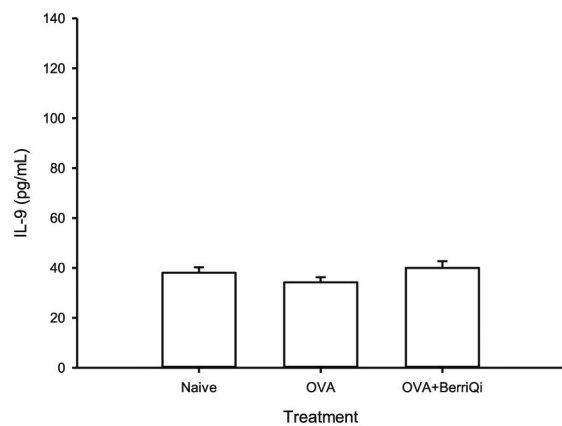**E**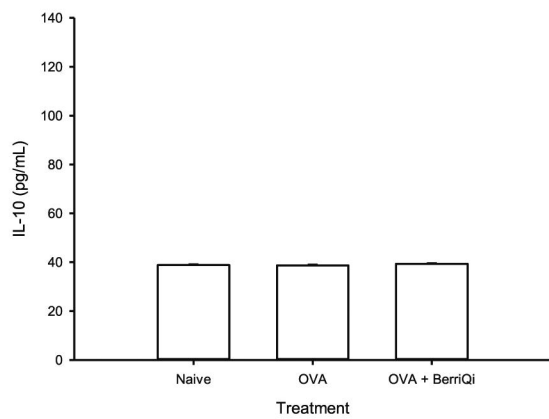**F**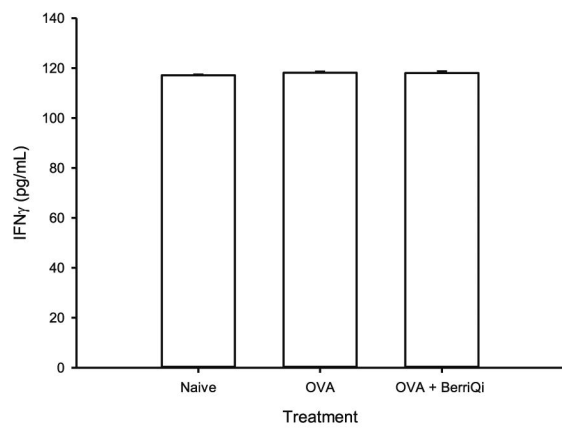

**A**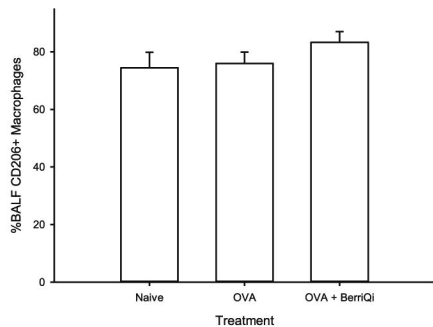**B**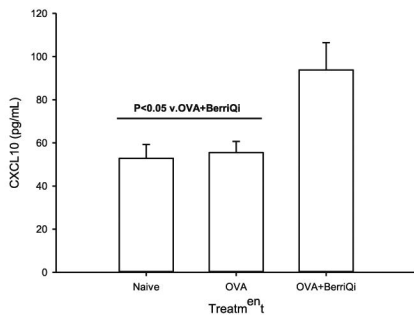**C**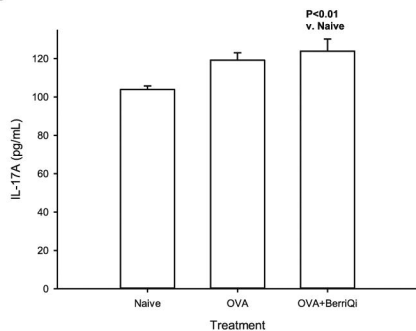**D**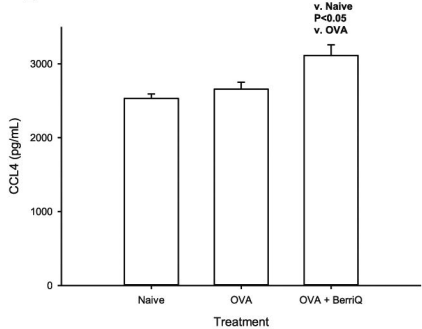**E**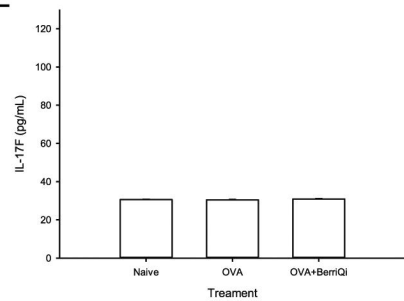

Source: https://www.biorxiv.org/content/10.1101/2020.03.03.974196v2.full.pdf
